# Supplementary material for: The African citrus psyllid Trioza erytreae: An efficient vector of Candidatus Liberibacter asiaticus
Source: PubMed Central journal article supplement (PMC9815554; doi:10.3389/fpls.2022.1089762), 2022-12-22
Supplement: Image_1.pdf [file Image_1.pdf]

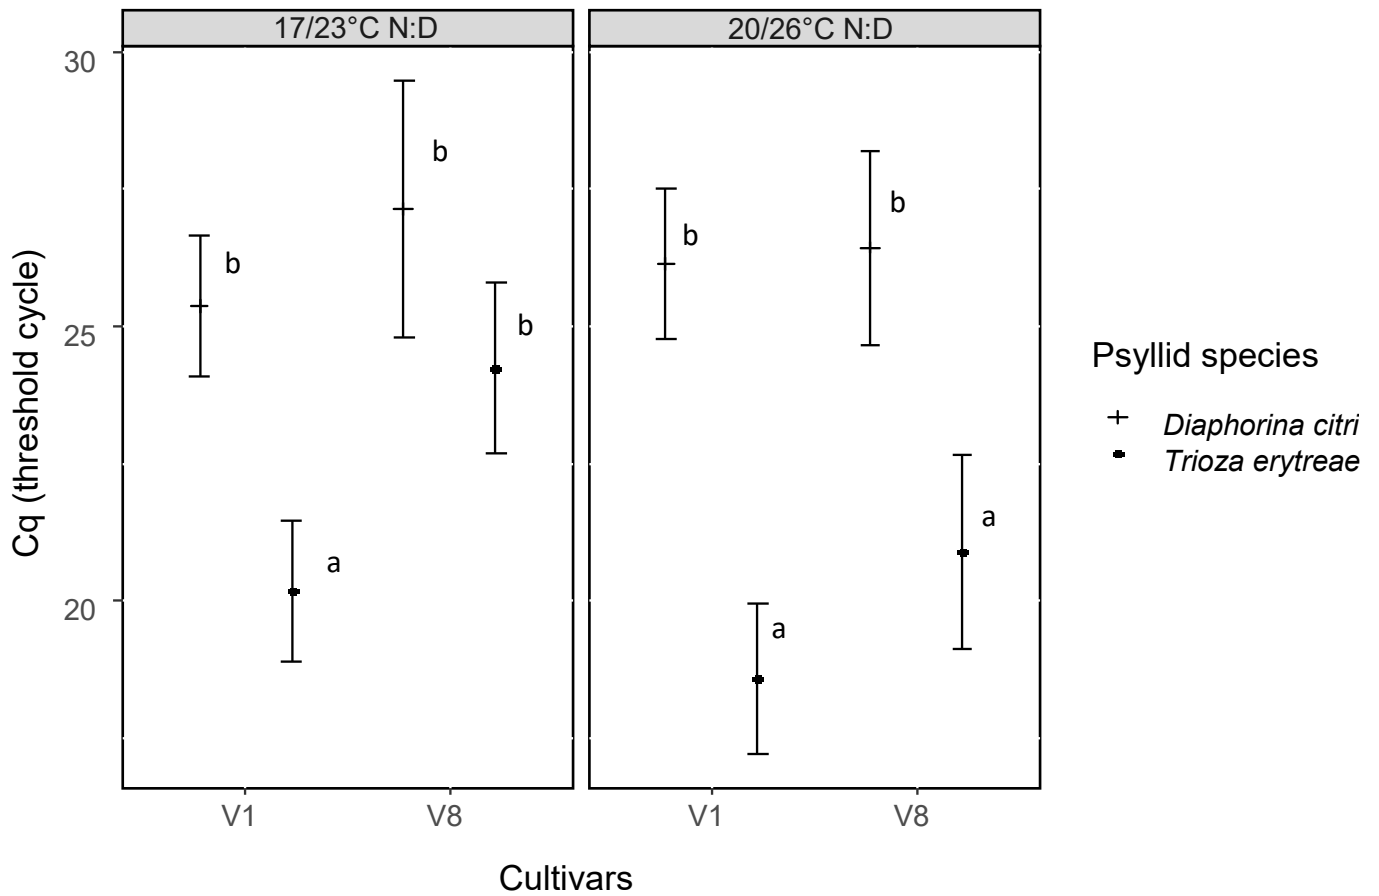

Supp data figure 1. Average predicted values of the CLas Cq of *Diaphorina citri* and *Trioza erytreae* that were used in the whole experiment and collected after the last 3-day IAP3.
